# Supplementary material for: Association Between Rates of Down Syndrome Diagnosis in States With vs Without 20-Week Abortion Bans From 2011 to 2018
Source: PubMed Central journal article supplement (PMC10031387; doi:10.1001/jamanetworkopen.2023.3684), 2023-03-21
Supplement: jamanetwopen-e233684-s001.pdf [file jamanetwopen-e233684-s001.pdf]

## Data Sharing Statement

Chaiken. Association Between Rates of Down Syndrome Diagnosis in States With vs Without 20-Week Abortion Bans From 2011 to 2018. *JAMA Netw Open*. Published March 21, 2023. doi:10.1001/jamanetworkopen.2023.3684

### Data

**Data available:** No

### Additional Information

**Explanation for why data not available:** We will not be sharing the data as this dataset is publicly available.
